# Supplementary material for: ALK-Brain Prognostic Index—Preliminary Study of a Prognostic Tool for Patients with ALK-Rearranged, Non-small Cell Lung Cancer and Brain Metastases
Source: PubMed Central journal article supplement (PMC7408161; doi:10.3390/cancers12071804), 2020-07-06
Supplement: cancers-12-01804-s001.pdf [file cancers-12-01804-s001.pdf]

Supplementary Materials

## ALK-Brain Prognostic Index—Preliminary Study of a Prognostic Tool for Patients with ALK-Rearranged, Nonsmall Cell Lung Cancer and Brain Metastases

Table S1. Bootstrap validation of ALK-BPI, Lung-molGPA and DS-GPA.

|             | C-statistics | <i>p</i> -Value |             |        |
|-------------|--------------|-----------------|-------------|--------|
|             |              | ALK-BPI         | Lung-molGPA | DS-GPA |
| ALK-BPI     | 0.6354       | -               | 0.506       | 0.490  |
| Lung-molGPA | 0.6772       | -               | -           | 0.925  |
| DS-GPA      | 0.6796       | -               | -           | -      |

A bootstrap validation with 1000 samples was performed and the mean C-statistic over the bootstrap samples was used as a measure of model performance. C-statistics between scores were compared with the *p*-value.
